# Supplementary material for: Effects of Recombinant Leptin Proteins on the Expression of Key Genes in the HPG Axis and Liver of Tongue Sole In Vitro
Source: MDPI journal article supplement (doi:10.3390/fishes8120608), 2023-12-16
Supplement: s1 [file s1]

# Effects of Recombinant Leptin Proteins on the Expression of Key Genes in the HPG Axis and Liver of Tongue Sole In Vitro

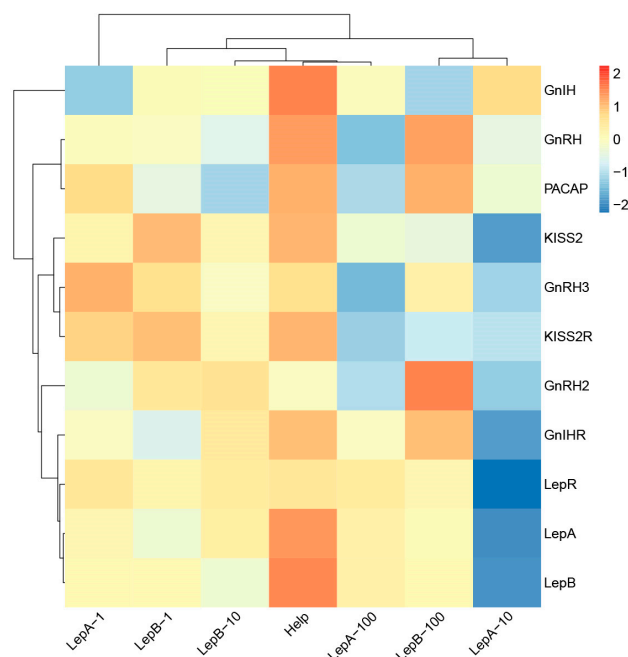

**Figure S2.** The expression of genes in the hypothalamus that are associated with growth and reproduction after incubation with recombinant tongue sole leptins and human leptin ( $P < 0.05$ ). C refers to the control group that only added culture medium; Hlep indicates human leptin ((10nmol/L in culture medium); LepA and LepB indicate tongue sole leptins A and B followed by the dose used (1, 10 or 100nmol/L).

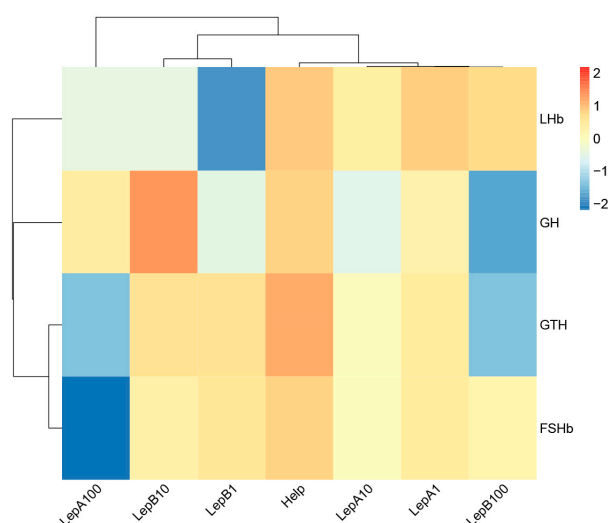

**Figure S3.** The expression of genes in the pituitary that are associated with growth and reproduction after incubating with recombinant tongue sole leptins and human leptin ( $P < 0.05$ ). C refers to the control group that only added culture medium; Hlep indicates human leptin ((10nmol/L in culture medium); LepA and LepB indicate tongue sole leptins A and B followed by the dose used (1, 10 or 100nmol/L).

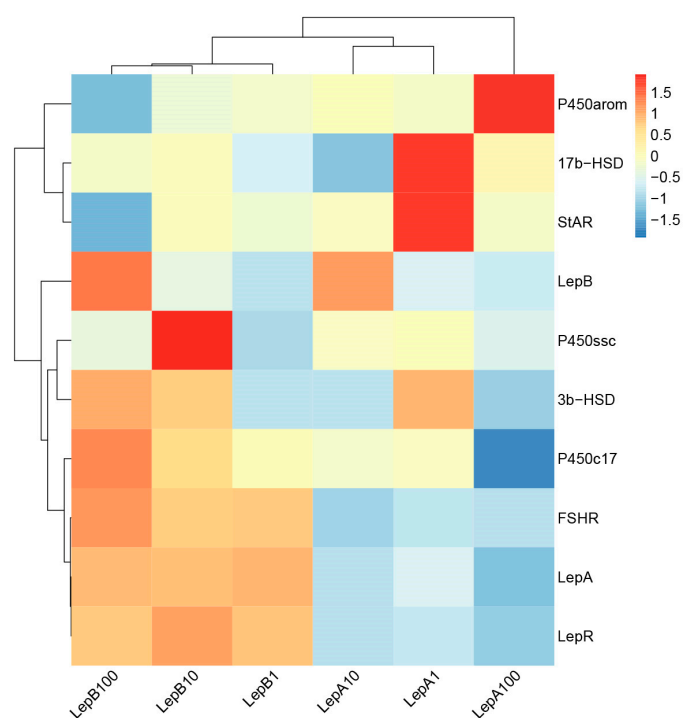

**Figure S4.** The expression of genes in the ovary that are associated with growth and reproduction after incubating with recombinant tongue sole leptins and human leptin ( $P < 0.05$ ). C refers to the control group that only added culture medium; LepA and LepB indicate tongue sole leptins A and B followed by the dose used (1, 10 or 100nmol/L).

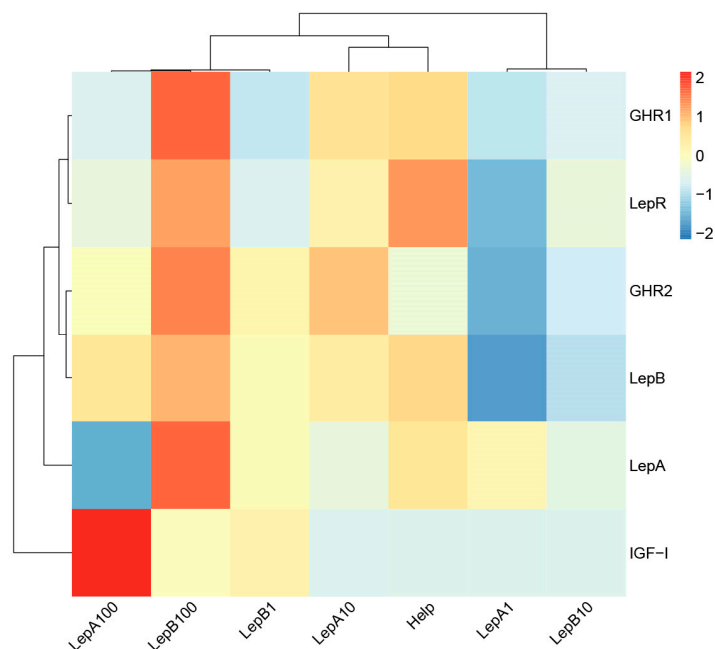

**Figure S5.** The expression of genes in the liver that are associated with growth and reproduction after incubating with recombinant tongue sole leptins and human leptin ( $P < 0.05$ ). C refers to the control group that only added culture medium; Hlep indicates human leptin ((10nmol/L in culture medium); LepA and LepB indicate tongue sole leptins A and B followed by the dose used (1, 10 or 100nmol/L).
